# Supplementary material
Source: MDPI journal article supplement (https://www.mdpi.com/2071-1050/14/3/1240)
Supplement: s1 [file s1]

## Supplementary Materials

**Table S1.** MRM conditions for each metabolite.

| Metabolite | Parent<br>( <i>m/z</i> ) | Product<br>( <i>m/z</i> ) | CV (V) | CE (V) | Polarity | Quantifier/Qualifier |
|------------|--------------------------|---------------------------|--------|--------|----------|----------------------|
| DHPS       | 155                      | 95                        | 2      | 14     | Negative | Quantifier           |
|            |                          | 80                        | 2      | 30     | Negative | Qualifier            |
| DMSP       | 135                      | 73                        | 2      | 12     | Positive | Quantifier           |
|            |                          | 63                        | 2      | 12     | Positive | Qualifier            |
|            |                          | 45                        | 2      | 23     | Positive | Qualifier            |

CV, cone voltage.

CE, optimized collision energies.

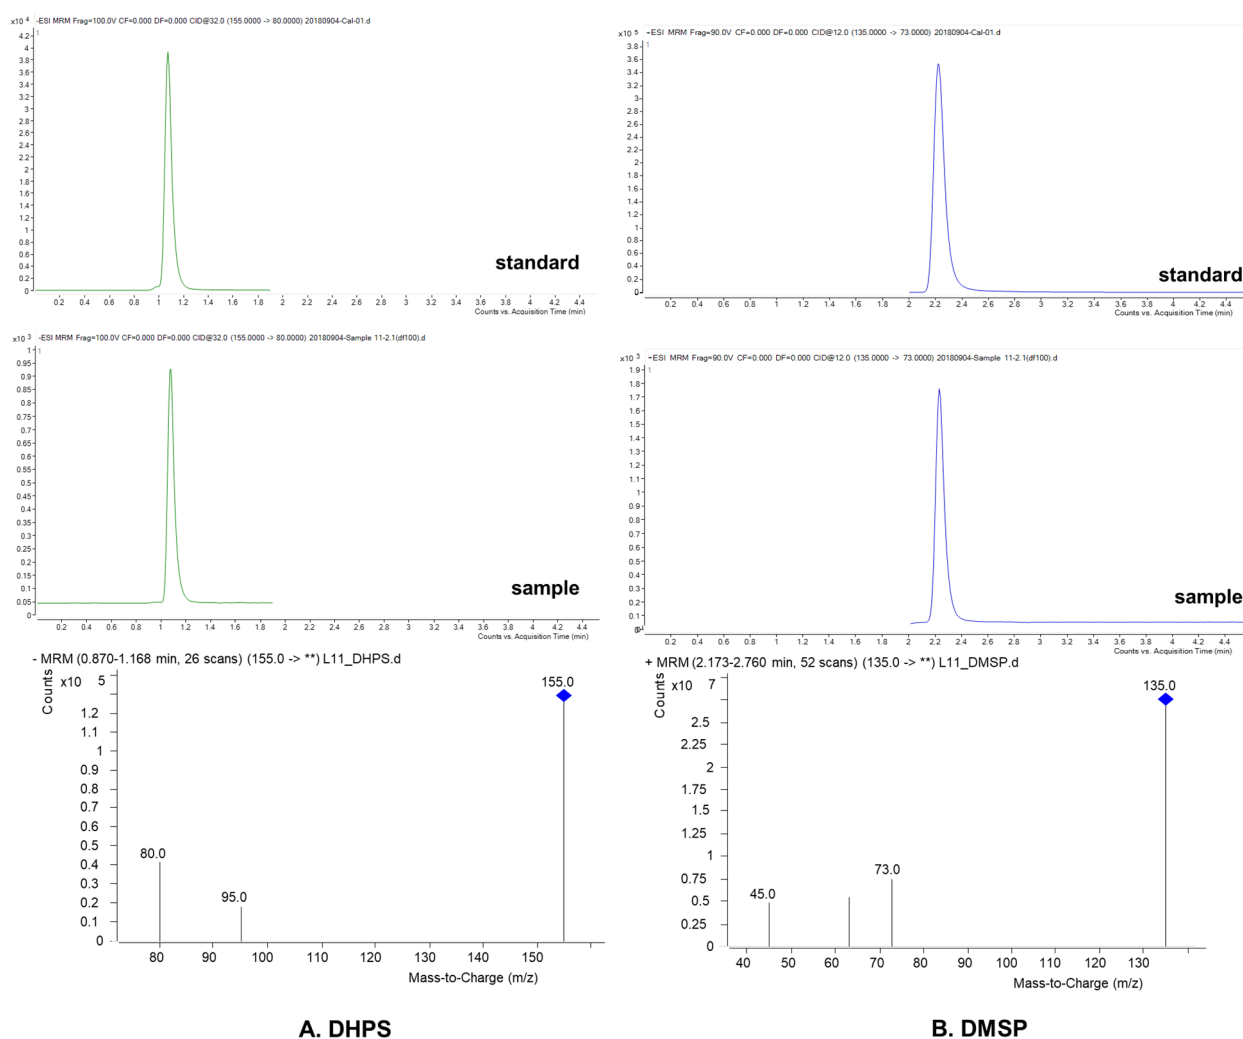

**Figure S1.** Analysis of DHPS (A) and DMSP (B) via targeted LC-MS/MS. The extracted ion chromatograms (EICs) from standard solutions (upper figures) and samples (middle figures) of the targeted analytes under the optimal conditions. The MS/MS characteristics of DHPS and DMSP are also shown (lower figures).

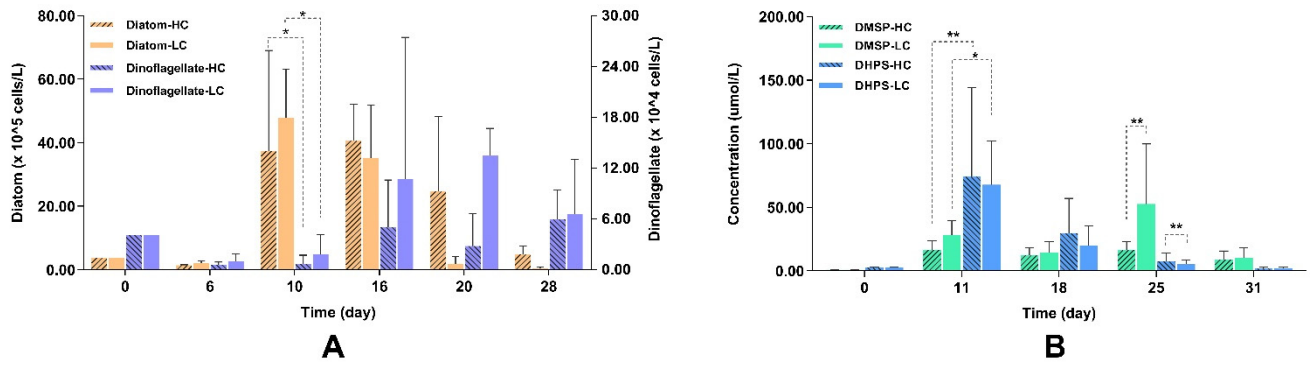

**Figure S2.** Community succession of the predominate phytoplankton (A), and concentrations of DHPS and DMSP (B) during the mesoscale experiment. HC: high  $p\text{CO}_2$  treatment groups, 1000 ppmv; LC: low  $p\text{CO}_2$  treatment groups, ~410 ppmv. (A) Data were quoted from [24]; Error bars represent standard deviation of replicates for different treatments (HC,  $n = 4$ ; LC,  $n = 3$ ). (B) The metabolite concentrations were present as the mean values with standard deviation of triplicate samples for replicate cultured bags ((HC,  $n = 12$ ; LC,  $n = 9$ ) with the same treatment. Two-way ANOVA analysis, \*,  $p < 0.05$ ; \*\*,  $p < 0.01$ .
