# Supplementary material
Source: MDPI journal article supplement (https://www.mdpi.com/2071-1050/14/3/1240)
Supplement: s1 [file s1]

Archive with 2 entries (2 files):
- Supplementary Materials.pdf
- Table S2. Concentrations of DHPS and DMSP in the studied ecosystems.xlsx
