# Supplementary material
Source: MDPI journal article supplement (https://www.mdpi.com/2071-1050/14/3/1240)
Supplement: s1 [file s1 › Table S2. Concentrations of DHPS and DMSP in the studied ecosystems.xlsx]

## Sheet: The Pear River Estuary
Table S2. Concentrations of DHPS and DMSP in the studied ecosystems. Results were calibrated by their respective recoveries and normalized by the volumes of filtered seawater.
Concentrations of DHPS and DMSP in the Pear River Estuary.
Sites	DHPS (nmol/L)			DMSP (nmol/L)
P1	0.612366	Detected	Detected	0.0339256	0.0169628	Detected
P5	0.0266246	0.0266246	Detected	Detected	0	0
P7	1.01174	1.49098	0.798738	0.0508884	0.0508884	0.0339256
A3	21.0601	7.85426	3.27483	1.03473	1.03473	0.220516
A8	71.5936	135.173	144.998	4.74959	2.6462	2.9176
A10	50.1608	89.4587	84.2403	3.73182	4.46122	4.3764
Detected, the targeted metabolites were detected but not quantified, because the concentrations were below the LLOQs.

## Sheet: Mesocosm
Concentrations of DHPS and DMSP during the coastal mesocosm experiment.
Time	Number of mesocosms	Treatment	DHPS (nmol/L)			DMSP (nmol/L)
0d	\	Initial	3.27483	1.91697	2.39621	0.814215	1.05169	1.01777
11d	#1	HC	30.9378	11.3421		12.0606	6.2932
	#3		29.4734	54.3941		20.6437	21.899
	#5		19.4626	84.9858		10.2795	10.8053
	#9		186.213	176.441		23.5274	25.8683
	#2	LC	28.302	73.83		20.508	14.571
	#4		46.8061	90.9763		43.1025	36.9111
	#6		45.4482	121.328		20.542	33.2132
18d	#1	HC	8.81275	13.3389		12.0097	12.5185
	#3		62.3016	65.3368		8.90547	10.0759
	#5		6.86915	45.4216		7.90467	9.36347
	#9		29.8728	20.6074		10.5678	8.37963
	#2	LC	8.83937	60.0385		6.31016	7.1583
	#4		11.9544	7.90751		24.9184	16.1825
	#6		10.7297	6.41653		27.361	22.9167
25d	#1	HC	3.51445	4.7658		8.76977	10.2455
	#3		15.7085	19.9685		27.1575	24.2907
	#5		4.31319	3.96707		112.633	112.446
	#9		6.4964	11.2888		11.2294	14.4693
	#2	LC	2.12997	2.95533		10.6696	13.7908
	#4		4.52618	5.51129		18.3198	17.4547
	#6		3.43457	1.43773		34.1801	30.9402
31d	#1	HC	2.71571	2.70009		2.17124
	#3		2.71571			4.76655
	#5		1.33123			18.8118
	#9		2.92871			4.03715
	#2	LC	2.95533	0.638991		3.61308	9.49917
	#4		0.905237	0.425994		15.5379	18.2859
	#6		2.39621			8.41355

## Sheet: Kueishantao hydrothermal system
Concentrations of DHPS and DMSP in the Kueishantao hydrothermal system.
0.2-3 μm
Sites	DHPS (nmol/L)			DMSP (nmol/L)
Y-S	0.0192291	0.0558949	0.016018	0.00123322	0.00123322	0.00123322
Y-M	0	0.00518784	0.0297558	0.00369966	0.00369966	0.00369966
Y-B	0.0228598	0.019382	0.0237834	0	0.00123322	0.00123322
W-S	0.0111645	0.0662527	0.0408259	0.0412306	0.0702913	0.0530741
W-M	0.0822379	0.0110684	0.00155297	0.0483621	0.0303564	0.0308467
W-B	0	0.0160474	0.00952472	0.00442355	0.0110183	0.00640569
A-S	0.0352769	0.0868119	0.0285008	1.19804	1.10909	1.22185
A-M	0.111414	0.0526197	0.0684171	0.0908173	0.0369806	0.0453685
A-B	0.177948	0.190471	0.137053	0.283914	0.304717	0.360749
3-20 μm
Sites	DHPS (nmol/L)			DMSP (nmol/L)
Y-S	0.0076384	0.00424182	0.00782644	0.11135	0.139526	0.165416
Y-M	0.00181604	0.00235606	0.0016572	0.149353	0.177091	0.148734
Y-B	0.0384818	0.0351606	0.0220022	0.0895388	0.0830692	0.108089
W-S	0.005171	0.00509563	0.0085006	0.434336	0.469981	0.693941
W-M	0.00835747	0.00912917	0.0116495	0.0167201	0.0288338	0.0203181
W-B	0.00410605	0.00440933	0.00286986	0.0280505	0.00460393	0.00472196
A-S	0.323616	0.399761	0.319406	0.0156837	0.0146163	0.00764337
A-M	0.367377	0.383273	0.362701	0.0113556	0.00619499	0.0100867
A-B	0.0785802	0.121538	0.227644	0.186585	0.182568	0.127411
